# Supplementary material for: Safety Profile and Immunologic Responses of a Novel Vaccine Against Shigella sonnei Administered Intramuscularly, Intradermally and Intranasally: Results From Two Parallel Randomized Phase 1 Clinical Studies in Healthy Adult Volunteers in Europe
Source: PubMed Central journal article supplement (PMC5552227; doi:10.1016/j.ebiom.2017.07.013), 2017-07-15

Figure 2a

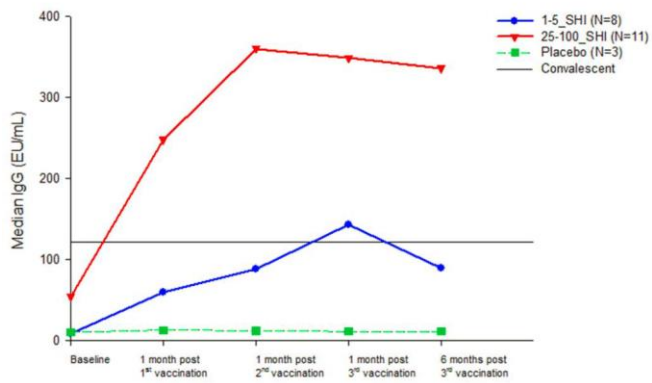

Figure 2b

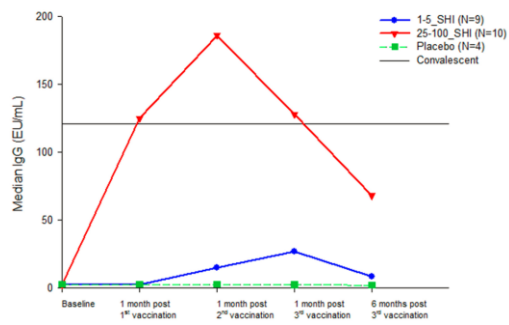

Supplement: mmc2.pdf [file mmc2.pdf]
