# Supplementary material for: Safety Profile and Immunologic Responses of a Novel Vaccine Against Shigella sonnei Administered Intramuscularly, Intradermally and Intranasally: Results From Two Parallel Randomized Phase 1 Clinical Studies in Healthy Adult Volunteers in Europe
Source: PubMed Central journal article supplement (PMC5552227; doi:10.1016/j.ebiom.2017.07.013), 2017-07-15
Supplement: mmc4.pdf [file mmc4.pdf]

**Supplementary Table 1: Number of subjects with solicited local and systemic adverse events reported from 30 minutes through 7 days after any injection**

| Study                        |                             | Trial 1 - H03_01TP |        |        |        |         |         | Trial 2 - H03_02TP |         |         |        |         |        |          |        |     |         |
|------------------------------|-----------------------------|--------------------|--------|--------|--------|---------|---------|--------------------|---------|---------|--------|---------|--------|----------|--------|-----|---------|
| Vaccine group                |                             | 1790GAHB           |        |        |        |         | Placebo | 1790GAHB           |         |         |        | Placebo |        | 1790GAHB |        |     | Placebo |
|                              |                             | IM                 |        |        |        |         | IM      | ID                 |         | IM      | ID     | IM      | IN     |          |        | IN  |         |
|                              |                             | 0-059/1            | 0-29/5 | 1-5/25 | 2-9/50 | 5-9/100 |         | 0-0059/0-1         | 0-059/1 | 0-59/10 | 0-29/5 |         | 0-29/5 | 1-2/20   | 4-8/80 |     |         |
|                              |                             | N=8                | N=9    | N=8    | N=8    | N=9     | N=8     | N=4                | N=6     | N=6     | N=6    | N=6     | N=1    | N=4      | N=6    | N=6 | N=7     |
| <b>Local reactions, n</b>    | <b>Severity</b>             |                    |        |        |        |         |         |                    |         |         |        |         |        |          |        |     |         |
| Pain at injection site       | Any <sup>a</sup>            | 8                  | 9      | 8      | 8      | 9       | 6       | 0                  | 2       | 3       | 5      | 2       | 1      | NA       | NA     | NA  | NA      |
|                              | Severe                      | 0                  | 0      | 0      | 1      | 1       | 0       | 0                  | 0       | 0       | 0      | 0       | 0      | NA       | NA     | NA  | NA      |
| Erythema                     | Any <sup>b</sup>            | 0                  | 0      | 0      | 0      | 3       | 1       | 0                  | 0       | 1       | 0      | 0       | 0      | NA       | NA     | NA  | NA      |
|                              | Severe                      | 0                  | 0      | 0      | 0      | 1       | 0       | 0                  | 0       | 0       | 0      | 0       | 0      | NA       | NA     | NA  | NA      |
| Induration                   | Any <sup>b</sup>            | 0                  | 0      | 0      | 2      | 2       | 0       | 0                  | 0       | 0       | 0      | 0       | 0      | NA       | NA     | NA  | NA      |
|                              | Severe                      | 0                  | 0      | 0      | 1      | 0       | 0       | 0                  | 0       | 0       | 0      | 0       | 0      | NA       | NA     | NA  | NA      |
| Swelling                     | Any <sup>b</sup>            | NA                 | NA     | NA     | NA     | NA      | NA      | 0                  | 0       | 0       | NA     | 0       | NA     | NA       | NA     | NA  | NA      |
|                              | Severe                      | NA                 | NA     | NA     | NA     | NA      | NA      | 0                  | 0       | 0       | NA     | 0       | NA     | NA       | NA     | NA  | NA      |
| Facial edema                 | Any <sup>a</sup>            | NA                 | NA     | NA     | NA     | NA      | NA      | NA                 | NA      | NA      | NA     | NA      | NA     | 0        | 0      | 1   | 0       |
|                              | Severe                      | NA                 | NA     | NA     | NA     | NA      | NA      | NA                 | NA      | NA      | NA     | NA      | NA     | 0        | 0      | 0   | 0       |
| Nasal pain                   | Any <sup>a</sup>            | NA                 | NA     | NA     | NA     | NA      | NA      | NA                 | NA      | NA      | NA     | NA      | NA     | 1        | 1      | 1   | 0       |
|                              | Severe                      | NA                 | NA     | NA     | NA     | NA      | NA      | NA                 | NA      | NA      | NA     | NA      | NA     | 0        | 0      | 0   | 0       |
| Rhinorrhea                   | Any <sup>a</sup>            | NA                 | NA     | NA     | NA     | NA      | NA      | NA                 | NA      | NA      | NA     | NA      | NA     | 2        | 4      | 4   | 1       |
|                              | Severe                      | NA                 | NA     | NA     | NA     | NA      | NA      | NA                 | NA      | NA      | NA     | NA      | NA     | 0        | 0      | 0   | 0       |
| <b>Systemic reactions, n</b> | <b>Severity<sup>c</sup></b> |                    |        |        |        |         |         |                    |         |         |        |         |        |          |        |     |         |
| Headache                     | Any                         | 3                  | 3      | 2      | 4      | 2       | 3       | 1                  | 3       | 1       | 1      | 3       | 1      | 4        | 3      | 3   | 4       |
|                              | Severe                      | 0                  | 1      | 0      | 1      | 0       | 0       | 0                  | 0       | 0       | 0      | 0       | 0      | 0        | 0      | 0   | 0       |
| Arthralgia                   | Any                         | 2                  | 0      | 2      | 3      | 3       | 1       | 1                  | 3       | 0       | 0      | 1       | 0      | 2        | 1      | 1   | 0       |
|                              | Severe                      | 0                  | 0      | 0      | 1      | 0       | 0       | 0                  | 0       | 0       | 0      | 0       | 0      | 0        | 0      | 0   | 0       |
| Chills                       | Any                         | 2                  | 0      | 1      | 1      | 0       | 1       | 0                  | 1       | 0       | 0      | 1       | 0      | 2        | 2      | 1   | 0       |
|                              | Severe                      | 0                  | 0      | 0      | 1      | 0       | 0       | 0                  | 0       | 0       | 0      | 0       | 0      | 0        | 0      | 0   | 0       |
| Fatigue                      | Any                         | 4                  | 3      | 6      | 5      | 5       | 5       | 2                  | 5       | 0       | 2      | 3       | 1      | 3        | 3      | 4   | 4       |
|                              | Severe                      | 0                  | 0      | 0      | 1      | 1       | 0       | 0                  | 0       | 0       | 1      | 0       | 0      | 0        | 0      | 0   | 0       |
| Malaise                      | Any                         | 0                  | 1      | 0      | 1      | 2       | 0       | 1                  | 2       | 1       | 1      | 1       | 0      | 2        | 1      | 4   | 2       |
|                              | Severe                      | 0                  | 0      | 0      | 1      | 0       | 0       | 0                  | 0       | 0       | 0      | 0       | 0      | 0        | 0      | 0   | 0       |
| Myalgia                      | Any                         | 5                  | 1      | 3      | 4      | 5       | 3       | 1                  | 2       | 1       | 1      | 0       | 1      | 2        | 1      | 2   | 1       |
|                              | Severe                      | 0                  | 0      | 0      | 1      | 0       | 0       | 0                  | 0       | 0       | 0      | 0       | 0      | 1        | 0      | 0   | 0       |
| Fever                        | ≥ 38 °C                     | 1                  | 0      | 0      | 0      | 0       | 0       | 0                  | 0       | 0       | 0      | 0       | 0      | 2        | 0      | 0   | 0       |

|                             |       |   |   |   |   |   |   |   |   |   |   |   |   |   |   |   |   |
|-----------------------------|-------|---|---|---|---|---|---|---|---|---|---|---|---|---|---|---|---|
| <b>Other, n</b>             | ≥40°C | 0 | 0 | 0 | 0 | 0 | 0 | 0 | 0 | 0 | 0 | 0 | 0 | 0 | 0 | 0 | 0 |
| Prevention of pain or fever |       | 0 | 0 | 0 | 0 | 0 | 0 | 0 | 0 | 0 | 0 | 0 | 0 | 0 | 0 | 0 | 0 |
| Treatment of pain or fever  |       | 2 | 2 | 2 | 1 | 0 | 1 | 1 | 1 | 1 | 1 | 0 | 1 | 1 | 1 | 1 | 0 |

IM=intramuscular. ID=intradermal. IN=intranasal. NA=not applicable

a Grading for injection site pain/nasal pain/facial edema/rhinorrhea was: grade 0 (absent) no pain; grade 1 (mild) present but does not interfere with activity; grade 2 (moderate) interferes with activity; grade 3 (severe) prevents daily activity. Any refers to injection site pain/nasal pain/facial edema/rhinorrhea at least grade 1

b Any refers to erythema/induration/swelling ≥25 mm in diameter, including severe erythema/induration/swelling (>100 mm).

c Grading for headache, arthralgia, chills, fatigue, malaise, myalgia was: grade 0 (absent) no reaction; grade 1 (mild) present but does not interfere with activity; grade 2 (moderate) interferes with activity; grade 3 (severe) prevents daily activity
