# Supplementary material for: Safety Profile and Immunologic Responses of a Novel Vaccine Against Shigella sonnei Administered Intramuscularly, Intradermally and Intranasally: Results From Two Parallel Randomized Phase 1 Clinical Studies in Healthy Adult Volunteers in Europe
Source: PubMed Central journal article supplement (PMC5552227; doi:10.1016/j.ebiom.2017.07.013), 2017-07-15
Supplement: mmc5.pdf [file mmc5.pdf]

**Supplementary Table 2: Trial 1 – ELISA GMCs, GMRs (95% CIs) and median at baseline, 1 month after first, second and third vaccination and at 6 months after third vaccination**

| Vaccine Group                      | <i>S. sonnei</i> (1790GAHB) - IM |                     |                   |                    |                   | Placebo - IM        |
|------------------------------------|----------------------------------|---------------------|-------------------|--------------------|-------------------|---------------------|
|                                    | 0-059/1<br>N=8                   | 0-29/5<br>N=9       | 1-5/25<br>N=8     | 2-9/50<br>N=7      | 5-9/100<br>N=9    | Placebo<br>N=8      |
| Baseline                           |                                  |                     |                   |                    |                   |                     |
| GMC (95% CI)                       | 4.71<br>(2.02-11)                | 7.74<br>(2.72-22)   | 27<br>(3.75-191)  | 8.78<br>(1.2-64)   | 6.91<br>(2.03-24) | 6.37<br>(2.38-17)   |
| Median                             | 2.57                             | 6.7                 | 23                | 2.62               | 2.92              | 4.23                |
| n                                  | 8                                | 9                   | 8                 | 7                  | 9                 | 8                   |
| 1 month after first vac.           |                                  |                     |                   |                    |                   |                     |
| GMC (95% CI)                       | 6.2<br>(1.97-20)                 | 23<br>(6.13-86)     | 141<br>(21-962)   | 186<br>(40-855)    | 157<br>(45-546)   | 6.35<br>(2.61-15)   |
| Median                             | 2.57                             | 13                  | 168               | 362                | 112               | 5.76                |
| n                                  | 8                                | 9                   | 8                 | 7                  | 9                 | 8                   |
| 1 month after first vac./Baseline  |                                  |                     |                   |                    |                   |                     |
| GMR (95% CI)                       | 1.32<br>(0.89-1.95)              | 2.96<br>(1.21-7.27) | 5.25<br>(1.48-19) | 21<br>(4.58-98)    | 23<br>(4.87-106)  | 1<br>(0.78-1.27)    |
| Median                             | 1                                | 1.93                | 2.85              | 12                 | 11                | 1                   |
| n                                  | 8                                | 9                   | 8                 | 7                  | 9                 | 8                   |
| 1 month after second vac.          |                                  |                     |                   |                    |                   |                     |
| GMC (95% CI)                       | 18<br>(6.95-49)                  | 41<br>(11-148)      | 314<br>(60-1646)  | 111<br>(17-717)    | 193<br>(52-707)   | 6.56<br>(2.5-17)    |
| Median                             | 17                               | 55                  | 263               | 219                | 255               | 4.56                |
| n                                  | 8                                | 9                   | 8                 | 6                  | 8                 | 8                   |
| 1 month after second vac./Baseline |                                  |                     |                   |                    |                   |                     |
| GMR (95% CI)                       | 3.91<br>(1.79-8.54)              | 5.32<br>(1.92-15)   | 12<br>(3.79-36)   | 22<br>(3.72-134)   | 28<br>(5.62-136)  | 1.03<br>(0.93-1.14) |
| Median                             | 3.31                             | 6.14                | 12                | 15                 | 16                | 0.98                |
| n                                  | 8                                | 9                   | 8                 | 6                  | 8                 | 8                   |
| 1 month after third vac.           |                                  |                     |                   |                    |                   |                     |
| GMC (95% CI)                       | 32<br>(10-98)                    | 67<br>(17-269)      | 486<br>(120-1959) | 149<br>(17-1289)   | 159<br>(47-539)   | 7.71<br>(2.31-26)   |
| Median                             | 24                               | 127                 | 349               | 283                | 205               | 6.11                |
| n                                  | 8                                | 9                   | 7                 | 6                  | 8                 | 8                   |
| 1 month after third vac./Baseline  |                                  |                     |                   |                    |                   |                     |
| GMR (95% CI)                       | 6.69<br>(1.97-23)                | 8.64<br>(2.59-29)   | 13<br>(3.62-46)   | 30<br>(3.97-227)   | 23<br>(5.17-101)  | 1.21<br>(0.79-1.87) |
| Median                             | 6.11                             | 9.76                | 16                | 27                 | 15                | 0.95                |
| n                                  | 8                                | 9                   | 7                 | 6                  | 8                 | 8                   |
| 6 Months after third vac.          |                                  |                     |                   |                    |                   |                     |
| GMC (95% CI)                       | 12<br>(2.66-57)                  | 42<br>(9.96-178)    | 418<br>(87-2002)  | 106<br>(9.89-1143) | 102<br>(27-383)   | 5.05<br>(1.65-15)   |
| Median                             | 7.8                              | 87                  | 288               | 231                | 68                | 4.4                 |
| n                                  | 8                                | 9                   | 7                 | 6                  | 8                 | 7                   |
| 6 Months after third vac./Baseline |                                  |                     |                   |                    |                   |                     |
| GMR (95% CI)                       | 2.62<br>(0.62-11)                | 5.43<br>(1.63-18)   | 11<br>(3.6-34)    | 21<br>(2.48-185)   | 15<br>(3.86-55)   | 0.98<br>(0.7-1.38)  |
| Median                             | 1.98                             | 7.06                | 15                | 16                 | 9.33              | 1.04                |
| n                                  | 8                                | 9                   | 7                 | 6                  | 8                 | 7                   |

CI = confidence interval. GMR = geometric mean ratio. GMC = geometric mean concentration. vac. = vaccination.
