# Supplementary material for: Safety Profile and Immunologic Responses of a Novel Vaccine Against Shigella sonnei Administered Intramuscularly, Intradermally and Intranasally: Results From Two Parallel Randomized Phase 1 Clinical Studies in Healthy Adult Volunteers in Europe
Source: PubMed Central journal article supplement (PMC5552227; doi:10.1016/j.ebiom.2017.07.013), 2017-07-15
Supplement: mmc6.pdf [file mmc6.pdf]

**Supplementary Table 3: Percentage (95% CI) of subjects with anti-LPS antibody titer >121 EU after vaccination\***

| Trial         | Vaccine group    |         | 28 days after 1 <sup>st</sup><br>vaccination | 28 days after 2 <sup>nd</sup><br>vaccination | 28 days after 3 <sup>rd</sup><br>vaccination | 6 months after last<br>vaccination |
|---------------|------------------|---------|----------------------------------------------|----------------------------------------------|----------------------------------------------|------------------------------------|
| 1             | 0-059/1<br>IM    | %       | 0%                                           | 13%                                          | 25%                                          | 25%                                |
|               |                  | 95% CI  | (0-37)                                       | (0-53)                                       | (3-65)                                       | (3-65)                             |
|               |                  | n       | 8                                            | 8                                            | 8                                            | 8                                  |
|               | 0-29/5<br>IM     | %       | 22%                                          | 33%                                          | 56%                                          | 22%                                |
|               |                  | 95% CI  | (3-60)                                       | (7-70)                                       | (21-86)                                      | (3-60)                             |
|               |                  | n       | 9                                            | 9                                            | 9                                            | 9                                  |
|               | 1-5/25<br>IM     | %       | 75%                                          | 75%                                          | 86%                                          | 71%                                |
|               |                  | 95% CI  | (35-97)                                      | (35-97)                                      | (42-100)                                     | (29-96)                            |
|               |                  | n       | 8                                            | 8                                            | 7                                            | 7                                  |
|               | 2-9/50<br>IM     | %       | 57%                                          | 50%                                          | 67%                                          | 50%                                |
|               |                  | 95% CI  | (18-90)                                      | (12-88)                                      | (22-96)                                      | (12-88)                            |
|               |                  | n       | 7                                            | 6                                            | 6                                            | 6                                  |
| 5-9/100<br>IM | %                | 44%     | 63%                                          | 50%                                          | 38%                                          |                                    |
|               | 95% CI           | (14-79) | (24-91)                                      | (16-84)                                      | (9-76)                                       |                                    |
|               | n                | 9       | 8                                            | 8                                            | 8                                            |                                    |
| Placebo<br>IM | %                | 0%      | 0%                                           | 0%                                           | 0%                                           |                                    |
|               | 95% CI           | (0-37)  | (0-37)                                       | (0-37)                                       | (0-41)                                       |                                    |
|               | n                | 8       | 8                                            | 8                                            | 7                                            |                                    |
| 2             | 0-0059/0-1<br>ID | %       | 0%                                           | 0%                                           | 0%                                           | 0%                                 |
|               |                  | 95% CI  | (0-60)                                       | (0-60)                                       | (0-60)                                       | (0-60)                             |
|               |                  | n       | 4                                            | 4                                            | 4                                            | 4                                  |
|               | 0-059/1<br>ID    | %       | 0%                                           | 0%                                           | 0%                                           | 0%                                 |
|               |                  | 95% CI  | (0-46)                                       | (0-52)                                       | (0-46)                                       | (0-46)                             |
|               |                  | n       | 6                                            | 5                                            | 6                                            | 6                                  |
|               | 0-59/10<br>ID    | %       | 20%                                          | 20%                                          | 20%                                          | 0%                                 |
|               |                  | 95% CI  | (1-72)                                       | (1-72)                                       | (1-72)                                       | (0-52)                             |
|               |                  | n       | 5                                            | 5                                            | 5                                            | 5                                  |
|               | 0-29/5<br>IN     | %       | 0%                                           | 0%                                           | 0%                                           | 0%                                 |
|               |                  | 95% CI  | (0-60)                                       | (0-60)                                       | (0-60)                                       | (0-60)                             |
|               |                  | n       | 4                                            | 4                                            | 4                                            | 4                                  |
|               | 1-2/20<br>IN     | %       | 17%                                          | 17%                                          | 17%                                          | 17%                                |
|               |                  | 95% CI  | (0-64)                                       | (0-64)                                       | (0-64)                                       | (0-64)                             |
|               |                  | n       | 6                                            | 6                                            | 6                                            | 6                                  |
|               | 4-8/80<br>IN     | %       | 0%                                           | 0%                                           | 0%                                           | 0%                                 |
|               |                  | 95% CI  | (0-46)                                       | (0-52)                                       | (0-46)                                       | (0-46)                             |
|               |                  | n       | 6                                            | 5                                            | 6                                            | 6                                  |
|               | 0-29/5<br>IM     | %       | 17%                                          | 17%                                          | 33%                                          | 17%                                |
|               |                  | 95% CI  | (0-64)                                       | (0-64)                                       | (4-78)                                       | (0-64)                             |
|               |                  | n       | 6                                            | 6                                            | 6                                            | 6                                  |
|               | Placebo          | %       | 0%                                           | 0%                                           | 0%                                           | 0%                                 |
|               |                  | 95% CI  | (0-23)                                       | (0-23)                                       | (0-25)                                       | (0-26)                             |
|               |                  | n       | 14                                           | 14                                           | 13                                           | 12                                 |

CI =confidence interval. Vaccine groups are quantified as per µg of OAg/µg of protein. ID= intradermal. IN= intranasal. IM=intramuscular.
