# Supplementary material for: Safety Profile and Immunologic Responses of a Novel Vaccine Against Shigella sonnei Administered Intramuscularly, Intradermally and Intranasally: Results From Two Parallel Randomized Phase 1 Clinical Studies in Healthy Adult Volunteers in Europe
Source: PubMed Central journal article supplement (PMC5552227; doi:10.1016/j.ebiom.2017.07.013), 2017-07-15
Supplement: mmc7.pdf [file mmc7.pdf]

**Supplementary Table 4: Trial 2 – ELISA GMCs, GMRs (95% CIs) and median at baseline, 1 month after first, second and third vaccination and at 6 months after third vaccination**

| Vaccine Group                      | ID                  |                     |                     | IN                  |                     |                     | IM                  |                     |
|------------------------------------|---------------------|---------------------|---------------------|---------------------|---------------------|---------------------|---------------------|---------------------|
|                                    | 0-0059/0-1<br>N=4   | 0-059/1<br>N=6      | 0-59/10<br>N=5      | 0-29/5<br>N=4       | 1-2/20<br>N=6       | 4-8/80<br>N=6       | 0-29/5<br>N=6       | Placebo<br>N=14     |
| Baseline                           |                     |                     |                     |                     |                     |                     |                     |                     |
| GMC (95% CI)                       | 7.71<br>(0.55-107)  | 1.8<br>(1.66-1.95)  | 5.14<br>(2.18-12)   | 3.65<br>(0.61-22)   | 14<br>(0.97-205)    | 2.11<br>(1.1-4.03)  | 8.27<br>(1.34-51)   | 3.29<br>(1.93-5.6)  |
| Median                             | 13                  | 1.78                | 5.8                 | 2.63                | 6.35                | 1.68                | 5.65                | 1.86                |
| n                                  | 4                   | 6                   | 5                   | 4                   | 6                   | 6                   | 6                   | 14                  |
| 1 month after first vac.           |                     |                     |                     |                     |                     |                     |                     |                     |
| GMC (95% CI)                       | 9.4<br>(0.48-184)   | 2.11<br>(1.43-3.11) | 12<br>(1.58-96)     | 4.08<br>(0.76-22)   | 13<br>(0.95-187)    | 2.09<br>(1.03-4.23) | 13<br>(1.69-102)    | 3.58<br>(2.1-6.08)  |
| Median                             | 23                  | 1.86                | 9.5                 | 3.23                | 5.35                | 1.55                | 20                  | 3.01                |
| n                                  | 4                   | 6                   | 5                   | 4                   | 6                   | 6                   | 6                   | 14                  |
| 1 month after first vac./Baseline  |                     |                     |                     |                     |                     |                     |                     |                     |
| GMR (95% CI)                       | 1.22<br>(0.69-2.15) | 1.17<br>(0.79-1.73) | 1.54<br>(0.61-3.9)  | 1.12<br>(0.86-1.45) | 0.95<br>(0.76-1.17) | 0.99<br>(0.9-1.09)  | 1.59<br>(0.84-3)    | 1.09<br>(0.76-1.54) |
| Median                             | 1.03                | 1.1                 | 1.24                | 1.11                | 0.95                | 1                   | 1.38                | 1.05                |
| n                                  | 4                   | 6                   | 4                   | 4                   | 6                   | 6                   | 6                   | 14                  |
| 1 month after second vac.          |                     |                     |                     |                     |                     |                     |                     |                     |
| GMC (95% CI)                       | 9.09<br>(0.49-167)  | 2.32<br>(1.2-4.5)   | 12<br>(1.45-107)    | 3.78<br>(0.61-23)   | 15<br>(1.04-219)    | 1.72<br>(1.59-1.86) | 17<br>(2.47-120)    | 3.28<br>(1.98-5.42) |
| Median                             | 23                  | 2.03                | 7.5                 | 2.7                 | 7.55                | 1.75                | 14                  | 1.91                |
| n                                  | 4                   | 5                   | 5                   | 4                   | 6                   | 5                   | 6                   | 14                  |
| 1 month after second vac./Baseline |                     |                     |                     |                     |                     |                     |                     |                     |
| GMR (95% CI)                       | 1.18<br>(0.72-1.93) | 1.32<br>(0.66-2.62) | 1.49<br>(0.6-3.7)   | 1.03<br>(0.9-1.19)  | 1.07<br>(0.96-1.19) | 1.05<br>(0.98-1.13) | 2.09<br>(1.45-3)    | 1<br>(0.89-1.11)    |
| Median                             | 1.02                | 1.09                | 1.15                | 1.07                | 1.05                | 1.04                | 2.18                | 1.03                |
| n                                  | 4                   | 5                   | 4                   | 4                   | 6                   | 5                   | 6                   | 14                  |
| 1 month after third vac.           |                     |                     |                     |                     |                     |                     |                     |                     |
| GMC (95% CI)                       | 8.63<br>(0.43-173)  | 1.75<br>(1.62-1.89) | 14<br>(2.43-85)     | 3.85<br>(0.79-19)   | 19<br>(1.31-270)    | 2.21<br>(1.23-3.97) | 20<br>(2.29-179)    | 3.49<br>(1.98-6.14) |
| Median                             | 20                  | 1.68                | 9.9                 | 3.11                | 23                  | 1.75                | 13                  | 2.03                |
| n                                  | 4                   | 6                   | 5                   | 4                   | 6                   | 6                   | 6                   | 13                  |
| 1 month after third vac./Baseline  |                     |                     |                     |                     |                     |                     |                     |                     |
| GMR (95% CI)                       | 1.12<br>(0.59-2.12) | 0.97<br>(0.93-1.01) | 1.87<br>(0.82-4.25) | 1.05<br>(0.73-1.51) | 1.34<br>(0.7-2.56)  | 1.05<br>(0.97-1.14) | 2.45<br>(1.41-4.25) | 1.11<br>(0.93-1.32) |
| Median                             | 0.92                | 0.99                | 1.93                | 1.07                | 0.99                | 1.04                | 3.14                | 1.07                |
| n                                  | 4                   | 6                   | 4                   | 4                   | 6                   | 6                   | 6                   | 13                  |
| 6 Months after third vac.          |                     |                     |                     |                     |                     |                     |                     |                     |
| GMC (95% CI)                       | 6.23<br>(0.55-70)   | 1.7<br>(1.7-1.7)    | 6.69<br>(0.91-49)   | 3.2<br>(0.78-13)    | 16<br>(1.05-254)    | 2.58<br>(1.36-4.9)  | 15<br>(1.56-148)    | 2.59<br>(1.62-4.13) |
| Median                             | 8.95                | 1.7                 | 6.2                 | 2.65                | 10                  | 1.87                | 5.8                 | 1.77                |
| n                                  | 4                   | 6                   | 5                   | 4                   | 6                   | 6                   | 6                   | 12                  |
| 6 Months after third vac./Baseline |                     |                     |                     |                     |                     |                     |                     |                     |
| GMR (95% CI)                       | 0.81<br>(0.35-1.85) | 0.95<br>(0.87-1.02) | 0.83<br>(0.27-2.56) | 0.88<br>(0.56-1.36) | 1.16<br>(0.85-1.58) | 1.22<br>(0.91-1.64) | 1.84<br>(0.93-3.63) | 0.77<br>(0.55-1.08) |
| Median                             | 0.91                | 0.96                | 0.97                | 0.98                | 1.04                | 1.11                | 1.79                | 0.97                |
| n                                  | 4                   | 6                   | 4                   | 4                   | 6                   | 6                   | 6                   | 12                  |

CI =confidence interval. Vaccine groups are quantified as per  $\mu\text{g}$  of OAg/ $\mu\text{g}$  of protein. ID= intradermal. IN= intranasal. IM=intramuscular. GMR = geometric mean ratio. GMC = geometric mean concentration. vac.= vaccination.
